# Supplementary material for: The oldest record of ornithuromorpha from the early cretaceous of China
Source: PubMed Central journal article supplement (PMC5426517; doi:10.1038/ncomms7987), 2015-05-05
Supplement: ncomms7987-s1.pdf [file ncomms7987-s1.pdf]

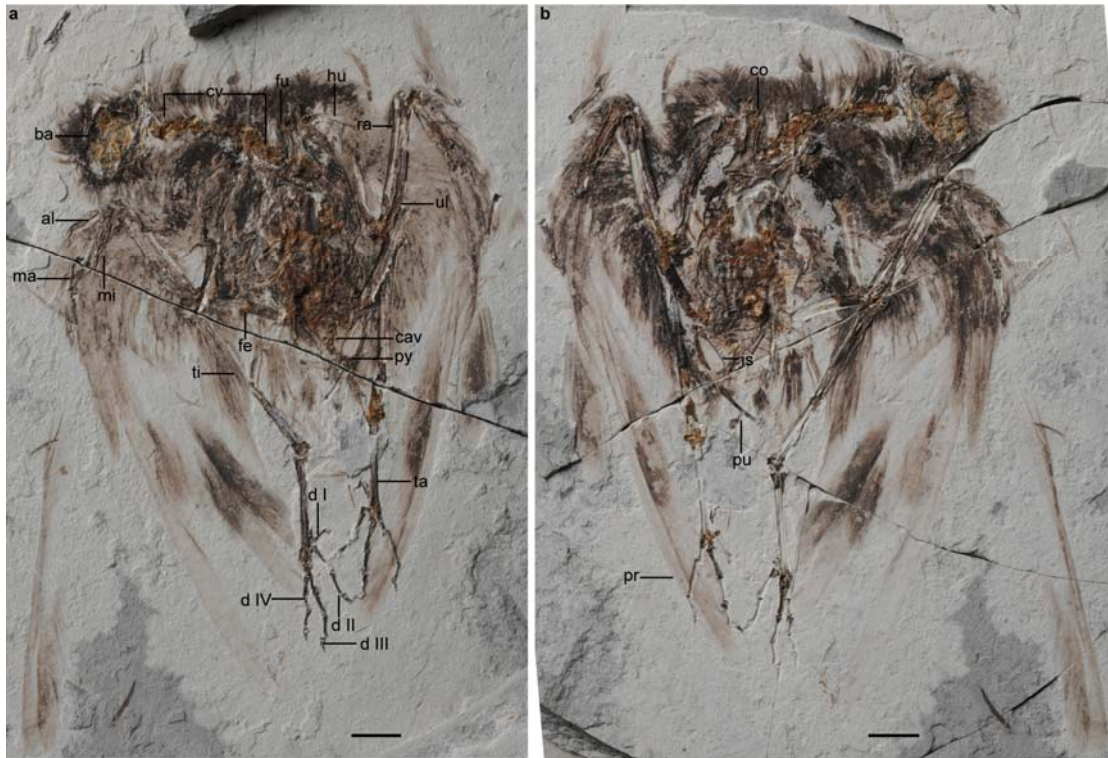

**Supplementary Figure 1.** Paratype of *Archaeornithura meemannae* gen. et sp. nov.

(a) STM7-163, main slab; (b) counter slab. Anatomical abbreviations: al, alular digit; ba, basicranium; cav, caudal vertebrae; co, coracoid; cv, cervical vertebrae; d I–IV, pedal digit I–IV; fe, femur; fu, furcula; ga, gastralia; hu, humerus; is, ischium; ma, major digit; mi, minor digit; pr, primary remiges; pu, pubis; py, pygostyle; ra, radius; sc, scapula; ta, tarsometatarsus; ti, tibiotarsus; ul, ulna. Scale bars, 10 mm.

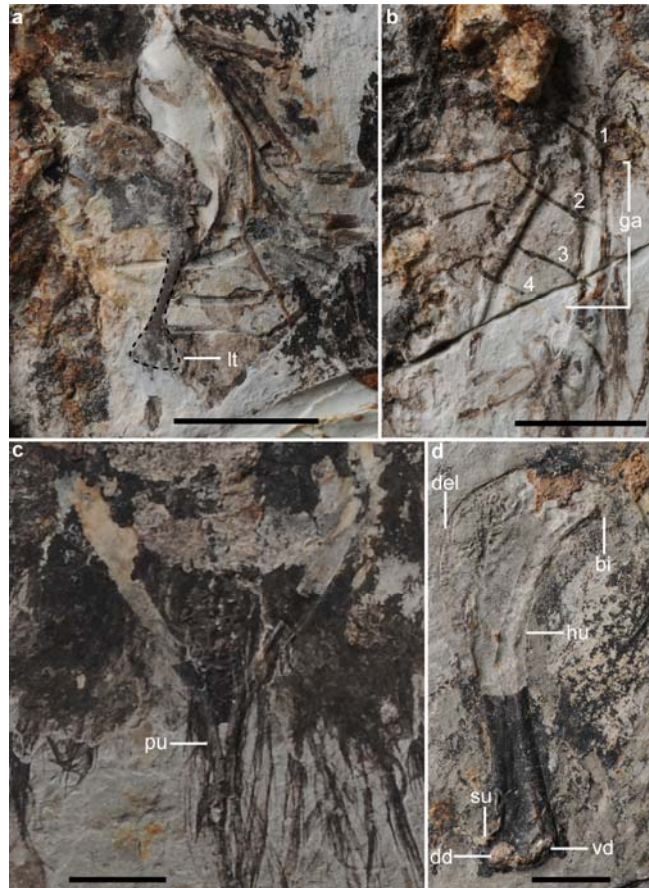

**Supplementary Figure 2.** Detail anatomy of *Archaeornithura meemanna* gen. et sp. nov. (a) Lateral trabecula of the sternum (outlined by dash line), STM7-163, counter slab; (b) four sets of gastralia, STM7-163, counter slab; (c) pubes, STM7-145, main slab; (d) right humerus in cranial view, STM7-145, counter slab. Anatomical abbreviations: bi, bicipital crest; dd, dorsal condyle; del, deltopectoral crest; ga, gastralia; hu, humerus; lt, lateral trabecula of the sternum; pu, pubis; su, dorsal supracondylar process; vd, ventral condyle. Scale bars, 5 mm.

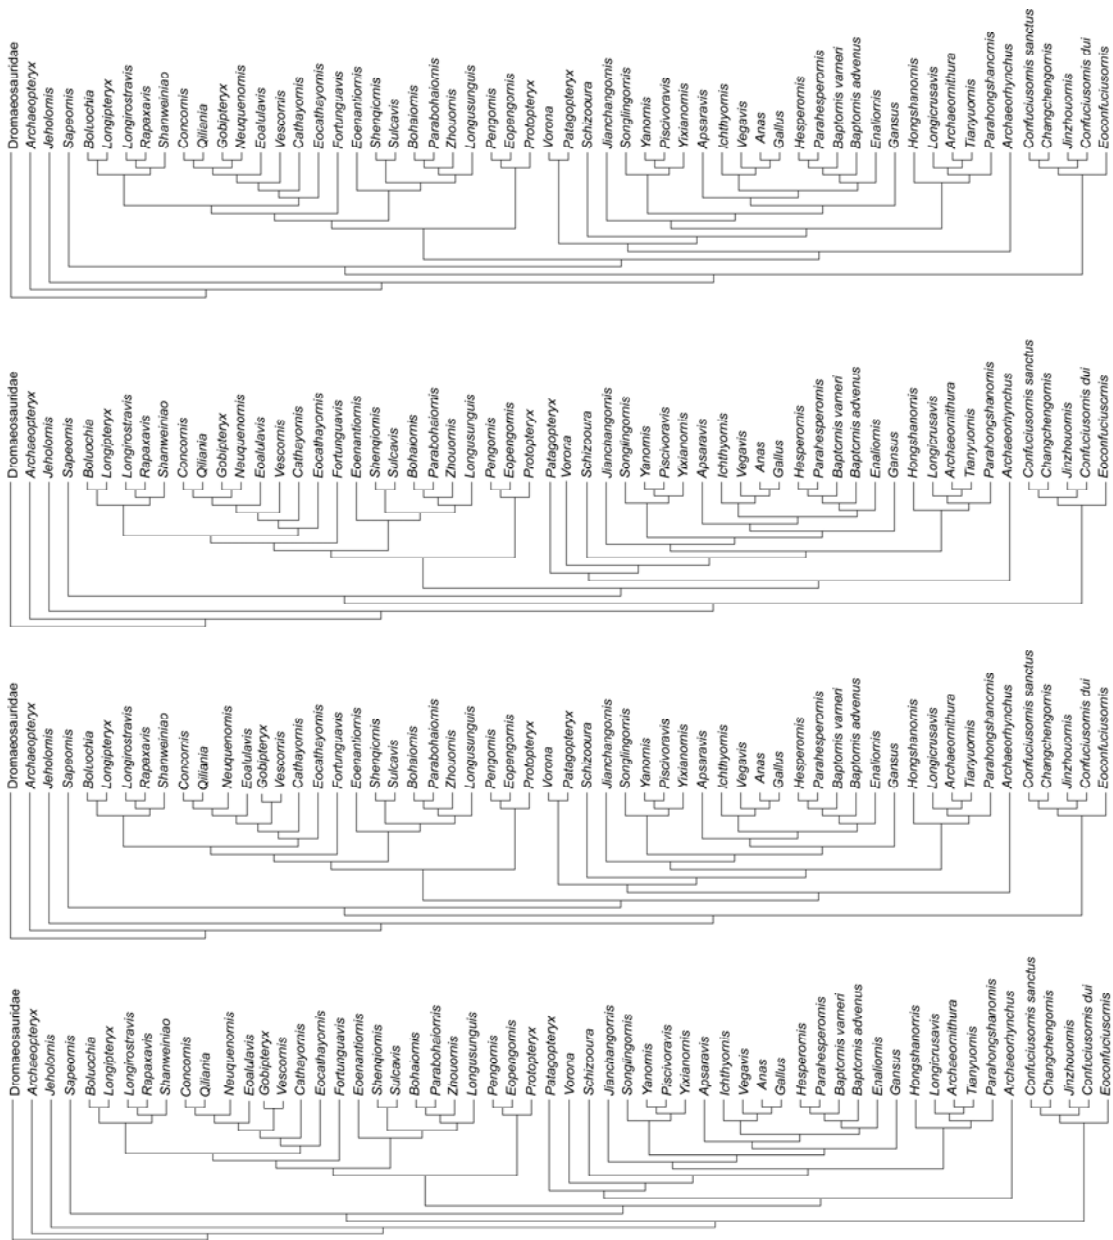

**Supplementary Figure 3.** The four most parsimonious trees (tree length = 997, CI = 0.367, RI = 0.684) produced from the phylogenetic analysis of the data set of Mesozoic Aves (262 morphological characters, 58 taxa).
